# Supplementary material for: Neutron scattering study of polyamorphic THF·17(H2O) – toward a generalized picture of amorphous states and structures derived from clathrate hydrates
Source: Royal Society of Chemistry journal article supplement (doi:10.1039/d3cp00539a), 2023-01-01
Supplement: d3cp00539a1.pdf [file d3cp00539a1.pdf]

## Supplementary Information

### Neutron scattering study of polyamorphic THF · (H<sub>2</sub>O)<sub>17</sub> – toward a generalized picture of amorphous states and structures derived from clathrate hydrates

Paulo H. B. Brant Carvalho,<sup>1,\*</sup> Mikhail Ivanov,<sup>1</sup> Ove Andersson,<sup>2</sup> Thomas Loerting,<sup>3</sup> Marion Bauer,<sup>3</sup> Chris A. Tulk,<sup>4</sup> Bianca Haberl,<sup>4</sup> Luke L. Daemen,<sup>4</sup> Jamie J. Molaison,<sup>4</sup> Katrin Amann-Winkel,<sup>3</sup> Alexander P. Lyubartsev,<sup>1</sup> Craig L. Bull,<sup>5,6</sup> Nicholas P. Funnell,<sup>5</sup> and Ulrich Häussermann<sup>1</sup>

<sup>1</sup>*Department of Materials and Environmental Chemistry, Stockholm University, SE-10691 Stockholm, Sweden*

<sup>2</sup>*Department of Physics, Umeå University, SE-90187 Umeå, Sweden*

<sup>3</sup>*Institute of Physical Chemistry, University of Innsbruck, A-6020 Innsbruck, Austria*

<sup>4</sup>*Neutron Scattering Division, Oak Ridge National Laboratory, Oak Ridge, Tennessee 37831, USA*

<sup>5</sup>*ISIS Neutron and Muon Source, Rutherford Appleton Laboratory, Didcot, Oxon, UK, OX11 7XN*

<sup>6</sup>*School of Chemistry, University of Edinburgh, David Brewster Road, Edinburgh EH9 3FJ, Scotland*

Figure S1 shows THF-CH density versus pressure plot from MD simulations and experiments comparing the present work to previous results [1].

### References

[1] Brant Carvalho et al., *Elucidation of the pressure induced amorphization of tetrahydrofuran clathrate hydrate*, J. Chem. Phys. (2019) 150, 204506.

## Supplemental figures

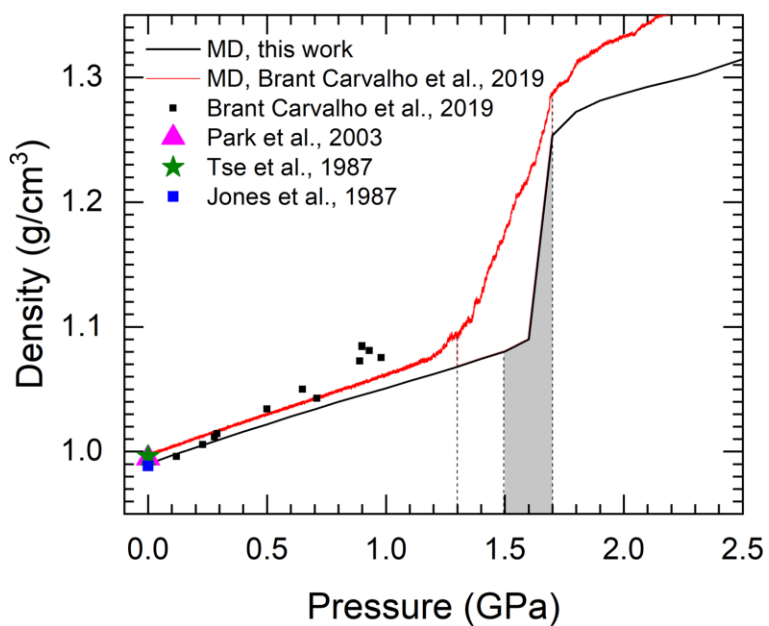

**Figure S1.** THF-CH density versus pressure (at 130 K) from MD simulations (lines) compared to experimental data (scatter points) from various authors. Vertical dashed lines mark the start and end of PIA, shaded area shows the different ranges of PIA by different authors.
